# Supplementary material for: Prevalence and Predictors of COVID-19 Vaccine Hesitancy among Health Care Workers in Tertiary Health Care Institutions in a Developing Country: A Cross-Sectional Analytical Study
Source: Hindawi journal article supplement (doi:10.1155/2022/7299092), 2022-03-22
Supplement: f1 [file 7299092.f1.pdf]

## QUESTIONNAIRE

### **Prevalence and Predictors of COVID19 Vaccine Hesitancy among Health Care Workers in Tertiary Health Care Institutions in a developing country. A Cross-sectional analytical study.**

#### **SECTION A - SOCIO-DEMOGRAPHIC CHARACTERISTICS**

---

---

1. **Age** (1) 20-29 ..... (2) 30-39..... (3) 40-49..... (4) 50 and above.....
2. **Gender:** (1) Male..... (2) Female.....
3. **Marital status:** (1) Married.... (2) Single.... (3) Divorced/Separated....
4. **Religion:** (1) Catholic..... (2) Anglican..... (3)Pentecostal..... (4) Traditional..... (S) Muslim.....
5. **HCW:** (1) Doctor..... (2)Nurse/Midwife..... (3) Pharmacists..... (4) Lab Scientist..... (5) Others.....
6. **Educational level:** (1) Diploma..... (2) First degree..... (3) Postgraduate.....
7. **Mode of usual transport to work:** (1) Private transport ..... (2) Public transport.....
8. **Type of residence:** (1) Self Owned house..... (2) Self Rented house..... (3) Family house.....

---

#### **SECTION B -VACCINE UPTAKE INTENTION TO PRACTICE**

---

9. Is COVID 19 Infection real? (1) Yes..... (2) No..... (3) I don't know.....
10. (A) Have you received COVID 19 Vaccination? (1) Yes..... (2)No.....  
(B) If No, would you like to receive the vaccine? (1) Yes..... (2) No..... (3) I don't know.....
11. Would you encourage hospital patients to take the vaccine? (1) Yes..... (2) No..... (3) I don't know.....
12. Would you stop your family/relatives from taking the vaccine? (1) Yes..... (2) No..... (3) I don't know.....
13. Would you discourage friends/neighbours from taking vaccines? (1) Yes..... (2) No..... (3) I don't know.....
14. Would you encourage the Government to mandate its workers to take the vaccine? (1) Yes..... (2)No.....

---

#### **SECTION C-CONTEXTUAL PERCEPTION FACTORS ON VACCINE UPTAKE**

---

15. Do you trust information from the internet/social media about COVID 19 and vaccine? (1)Yes....(2) No...
16. Has information from internet/social media made you worry about taking vaccine? (1) Yes..... (2) No...
17. Have you heard your priest/pastor/imam speaking against COVID 19 vaccinations? (1) Yes..... (2) No.....
18. Have you experienced any past event that could reduce your trust in vaccines? (1) Yes.... (2) No.....
19. Does your religion or culture discourage vaccinations? (1) Yes..... (2) No.....
20. Do you trust the Government to provide the right vaccines? (1) Yes..... (2) No....
21. Would distance, transport cost or clinic wait time discourage you getting vaccine? (1) Yes..... (2) No.....
22. Would having a chronic illness discourage you from getting the vaccine? (1) Yes..... (2) No.....
23. Do you trust the vaccine producers to develop safe and effective vaccines? (1) Yes..... (2) No.....

---

## SECTION D-INDIVIDUAL PERCEPTION FACTORS ON VACCINE UPTAKE

---

24. Do you feel that, hearing of someone with an alleged reaction, would stop you taking the vaccine?  
(1) Yes.... (2) No..... (3)Not sure.....
25. Do you feel there are better ways to treat COVID 19 infection instead of using the vaccine?  
(1) Yes.... (2) No..... (3)Not sure.....
26. Do you feel there is enough information about vaccine and its safety? (1) Yes....(2) No ....(3) Not sure.....
27. Do you feel the Government has an ulterior motive to encourage you to take COVID 19 vaccination?  
(1) Yes.... (2) No..... (3)Not sure.....
28. Do you feel worried that you may get a reaction if you take the vaccine? (1) Yes.... (2) No ....
29. Do you feel you will take the vaccine if all your friends have taken the vaccine? (1) Yes.... (2) No ....

---

## SECTION E-VACCINE SPECIFIC PERCEPTION FACTORS ON VACCINE UPTAKE

---

30. Does your consideration for the vaccine depend on how safe it is perceived? (1)Yes.... (2) No.....
31. Does your consideration for the vaccine depend on how long it has been tested? (1) Yes..... (2) No.....
32. Does your consideration for the vaccine depend on the vaccine cost? (1) Yes.... (2) No.....
33. Does your consideration for the vaccine depend on which country it was produced in? (1) Yes...(2) No...
34. Does your consideration for the vaccine depend on type of COVID vaccine available? (1) Yes..... (2) No....
35. Does your consideration for the vaccine depend on how many doses are required? (1) Yes..... (2) No.....
36. Does your consideration for the vaccine depend on vaccine usage by your colleagues? (1) Yes...(2) No...
